# Supplementary material for: Fatigue Is a Major Symptom at COVID-19 Hospitalization Follow-Up
Source: J Clin Med. 2022 Apr 25;11(9):2411. doi: 10.3390/jcm11092411 (PMC9106038; doi:10.3390/jcm11092411)
Supplement: Supplementary file 1 [file jcm-11-02411-s001.zip › jcm-1668151-supplementary.pdf]

## Supplementary

**Table S1. Additional basic demographic characteristics during hospitalization**

|                                  | Overall. n=218 | Patients not requiring supplemental oxygen (group 1). (n=57) | Patients requiring supplemental oxygen (group 2) (n=120) | Patients admitted to ICU (group 3) (n= 41) |
|----------------------------------|----------------|--------------------------------------------------------------|----------------------------------------------------------|--------------------------------------------|
| Comorbidities                    |                |                                                              |                                                          |                                            |
| Ischemic heart disease           | 16 (7%)        | 6 (11%)                                                      | 5 (5%)                                                   | 5 (12%)                                    |
| Cerebrovascular disease          | 9 (4%)         | 1 (2%)                                                       | 7 (6%)                                                   | 1 (2%)                                     |
| Kidney disease                   | 5 (2%)         | 0 (0%)                                                       | 4 (3%)                                                   | 1 (2%)                                     |
| Immunodeficiency                 | 2 (1%)         | 2 (4%)                                                       | 0 (0%)                                                   | 0 (0%)                                     |
| Liver disease                    | 1 (0%)         | 0 (0%)                                                       | 1 (1%)                                                   | 0 (0%)                                     |
| Organ transplant                 | 1 (0%)         | 0 (0%)                                                       | 1 (1%)                                                   | 0 (0%)                                     |
| Other                            | 102 (47%)      | 24 (42%)                                                     | 63 (53%)                                                 | 15 (37%)                                   |
| Smoking status                   |                |                                                              |                                                          |                                            |
| Never smoker                     | 106 (54%)      | 31 (57%)                                                     | 60 (57%)                                                 | 15 (39%)                                   |
| Former smoker                    | 87 (44%)       | 21 (39%)                                                     | 44 (42%)                                                 | 22 (58%)                                   |
| Current smoker                   | 5 (3%)         | 2 (4%)                                                       | 2 (2%)                                                   | 1 (3%)                                     |
| Treatment during hospitalization |                |                                                              |                                                          |                                            |
| Intravenous fluids               | 124 (58%)      | 27 (47%)                                                     | 66 (55%)                                                 | 31 (82%)                                   |
| Antibiotics                      | 104 (48%)      | 17 (30%)                                                     | 49 (41%)                                                 | 38 (95%)                                   |
| Fungal treatment                 | 27 (13%)       | 2 (4%)                                                       | 5 (4%)                                                   | 20 (53%)                                   |
| Dialysis                         | 6 (3%)         | 0 (0%)                                                       | 2 (2%)                                                   | 4 (10%)                                    |

Data are n (%).

**Table S2. Additional characteristics for patients hospitalized for PCR-proven Covid-19 at follow-up**

|                       | Overall. n=218 | Patients not requiring supplemental oxygen (group 1). (n=57) | Patients requiring supplemental oxygen (group 2) (n=120) | Patients admitted to ICU (group 3) (n= 41) |
|-----------------------|----------------|--------------------------------------------------------------|----------------------------------------------------------|--------------------------------------------|
| Symptoms at follow-up |                |                                                              |                                                          |                                            |
| Expectoration         | 34 (16%)       | 8 (14%)                                                      | 15 (13%)                                                 | 11 (27%)                                   |
| Runny nose            | 27 (12%)       | 4 (7%)                                                       | 14 (12%)                                                 | 9 (22%)                                    |
| Loss of appetite      | 20 (9%)        | 8 (14%)                                                      | 7 (6%)                                                   | 5 (12%)                                    |
| Stomach pain          | 19 (9%)        | 5 (9%)                                                       | 9 (8%)                                                   | 5 (12%)                                    |
| Diarrhea              | 19 (9%)        | 4 (7%)                                                       | 8 (7%)                                                   | 7 (17%)                                    |
| Nausea                | 18 (8%)        | 6 (11%)                                                      | 8 (7%)                                                   | 4 (10%)                                    |
| Throat pain           | 14 (6%)        | 7 (12%)                                                      | 4 (3%)                                                   | 3 (7%)                                     |

Data are n (%).

**Table S3. Additional demographics and outcomes at follow-up stratified for treatment with RaD**

|                           | Oxygen-dependent patients <b>not</b> receiving systemic corticosteroids and remdesivir (RaD-) <i>n</i> =52 | Oxygen-dependent patients receiving systemic corticosteroids and remdesivir (RaD+) <i>n</i> =86 |
|---------------------------|------------------------------------------------------------------------------------------------------------|-------------------------------------------------------------------------------------------------|
| Comorbidities             |                                                                                                            |                                                                                                 |
| Hypertension              | 16 (31%)                                                                                                   | 34 (39%)                                                                                        |
| Asthma                    | 6 (12%)                                                                                                    | 19 (22%)                                                                                        |
| Diabetes                  | 3 (6%)                                                                                                     | 21 (24%)                                                                                        |
| Malignancy                | 5 (10%)                                                                                                    | 7 (8%)                                                                                          |
| COPD                      | 3 (6%)                                                                                                     | 8 (9%)                                                                                          |
| Symptoms at follow-up     |                                                                                                            |                                                                                                 |
| Fatigue                   | 26 (50%)                                                                                                   | 52 (60%)                                                                                        |
| Dyspnea                   | 22 (42%)                                                                                                   | 47 (55%)                                                                                        |
| Concentration impairment  | 13 (25%)                                                                                                   | 28 (33%)                                                                                        |
| Muscle pain               | 13 (25%)                                                                                                   | 28 (33%)                                                                                        |
| Coughing                  | 13 (25%)                                                                                                   | 25 (29%)                                                                                        |
| Pulmonary function        |                                                                                                            |                                                                                                 |
| FEV1, L/min               | 2.92 (2.67, 3.16)                                                                                          | 2.84 (2.65, 3.02)                                                                               |
| FVC, L/min                | 3.85 (3.55, 4.15)                                                                                          | 3.59 (3.38, 3.81)                                                                               |
| TLC, %                    | 96.21 (91.42, 100.99)                                                                                      | 89.54 (84.37, 94.72)                                                                            |
| RV, %                     | 100.35 (93.54, 107.17)                                                                                     | 94.86 (84.60, 105.11)                                                                           |
| 6MWT                      |                                                                                                            |                                                                                                 |
| Percent predicted, men    | 81.53 (74.08, 88.99)                                                                                       | 83.57 (78.42, 88.73)                                                                            |
| Percent predicted, female | 94.91 (85.06, 104.77)                                                                                      | 98.79 (89.87, 107.73)                                                                           |
| Desaturation below 92     | 7 (16%)                                                                                                    | 17 (24%)                                                                                        |
| Desaturation ≥4%-point    | 8 (18%)                                                                                                    | 25 (35%)                                                                                        |

Data are n(%), mean (95% CI).
